# Supplementary material for: circPDE4B prevents articular cartilage degeneration and promotes repair by acting as a scaffold for RIC8A and MID1
Source: PubMed Central journal article supplement (PMC8372377; doi:10.1136/annrheumdis-2021-219969), 2021-05-26

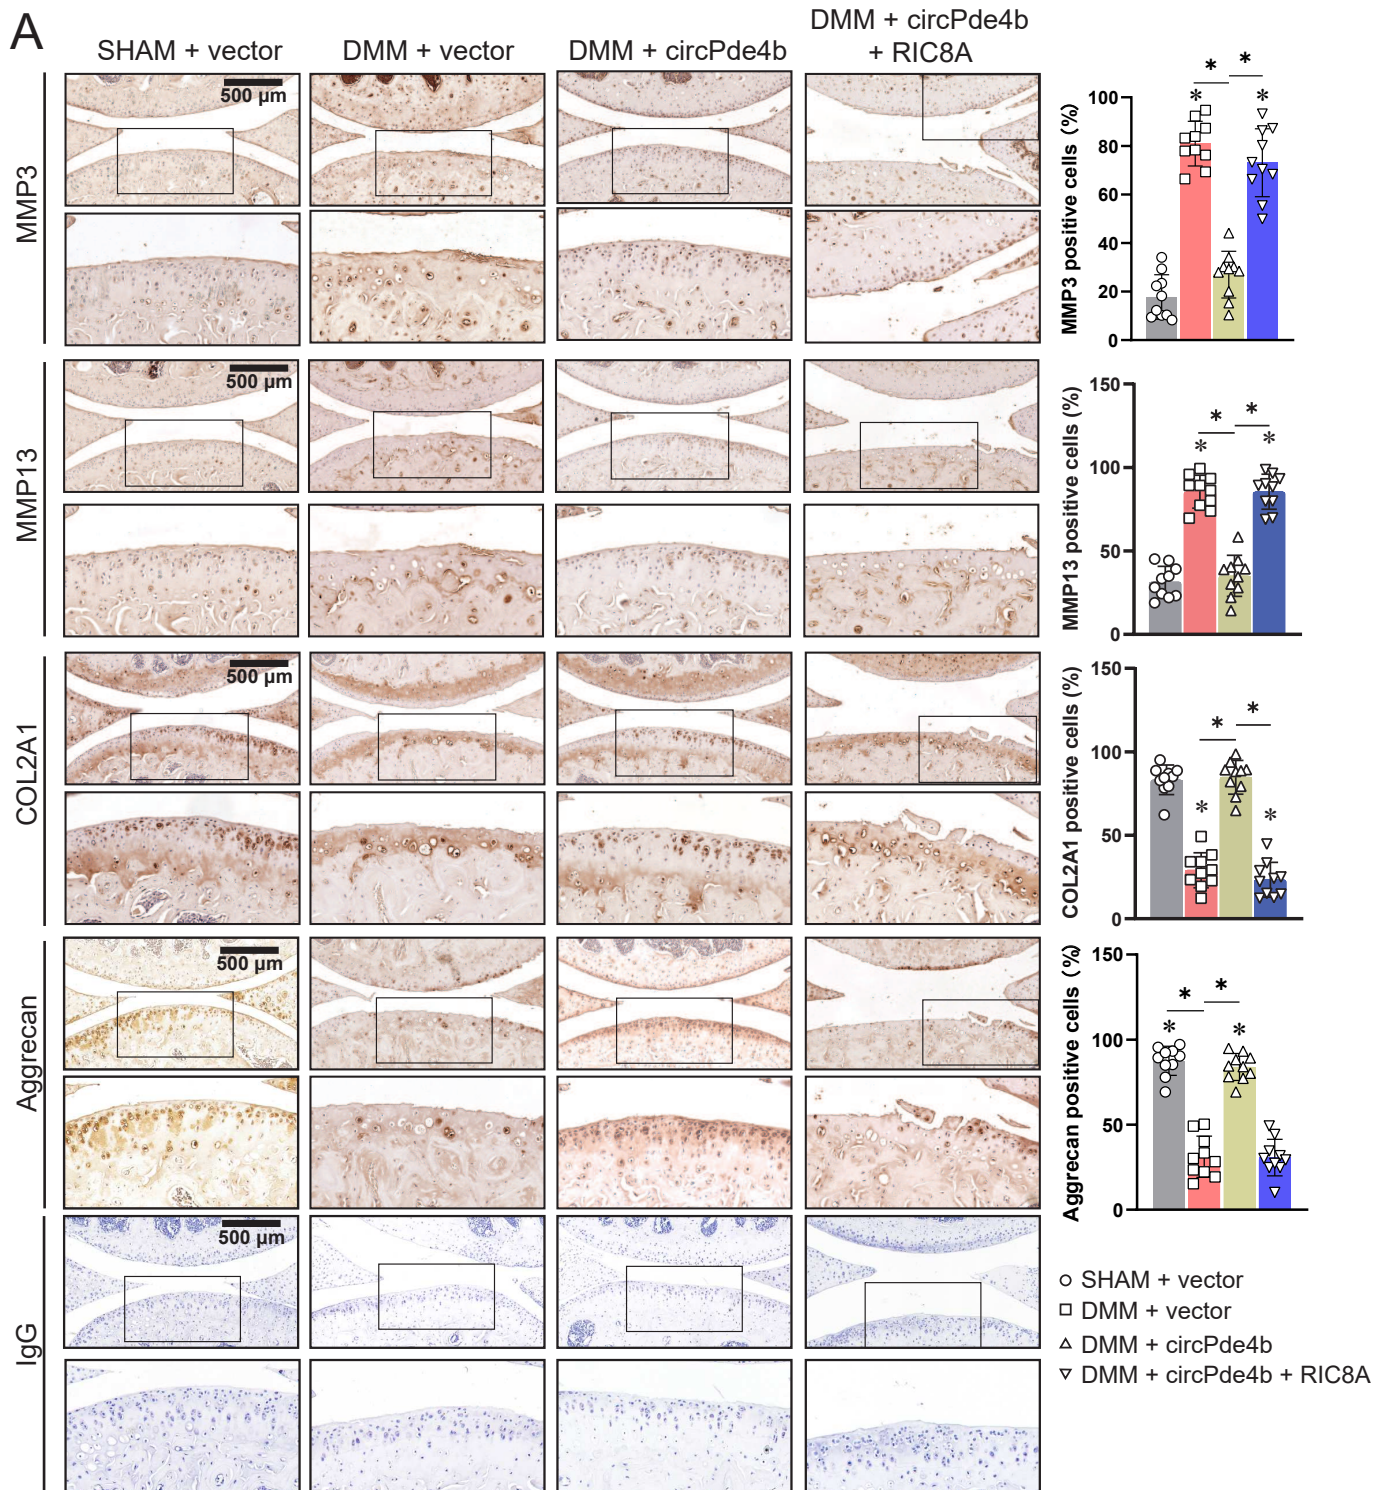

Supplement: annrheumdis-2021-219969supp010.pdf [file annrheumdis-2021-219969supp010.pdf]
